# Supplementary material for: Solar-blind ultraviolet photodetection of an α-Ga2O3 nanorod array based on photoelectrochemical self-powered detectors with a simple, newly-designed structure
Source: Royal Society of Chemistry journal article supplement (doi:10.1039/c9tc01417a), 2019-01-01
Supplement: c9tc01417a1.pdf [file c9tc01417a1.pdf]

† Electronic supplementary information (ESI)

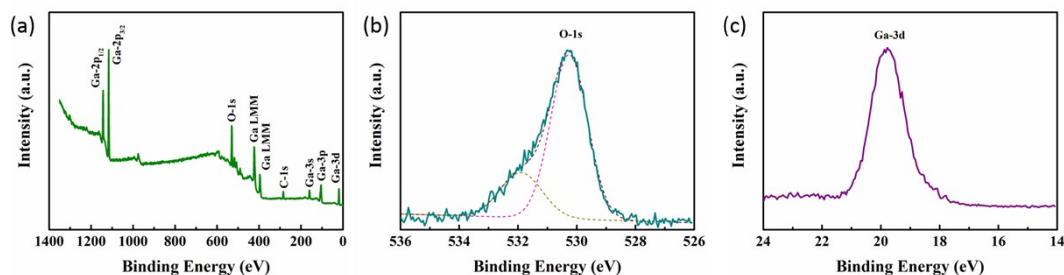

Fig. S1 XPS patterns of  $\alpha$ -Ga<sub>2</sub>O<sub>3</sub> nanorods array: survey spectrum (a), O 1s (b), Ga 3d (c).

Table S1

Table S1 Semi-quantitative analysis for the component content of  $\alpha$ -Ga<sub>2</sub>O<sub>3</sub> nanorods array sample by XPS

The survey spectrum of the film shown in Fig. S1(a) shows that only Ga and O can be detected. The O 1s core level of the film is also shown in Fig. S1(b), which is deconvoluted into two components. The sharp main peak located at 530.2 eV is attributed to the Ga–O bonds with the highest oxidation state of Ga from Ga<sub>2</sub>O<sub>3</sub>. The small shoulder centred at 532.0 eV presumably relates to the existence of ionization associated with weakly adsorbed species on the surface under air exposure. Fig. 1(c) can be assigned to Ga 3d from Ga<sub>2</sub>O<sub>3</sub> (20.0 eV). Semi-quantitative analysis of sample surface component content (table S1) by XPS shows a gallium/oxygen atomic ratio close to 2:3.

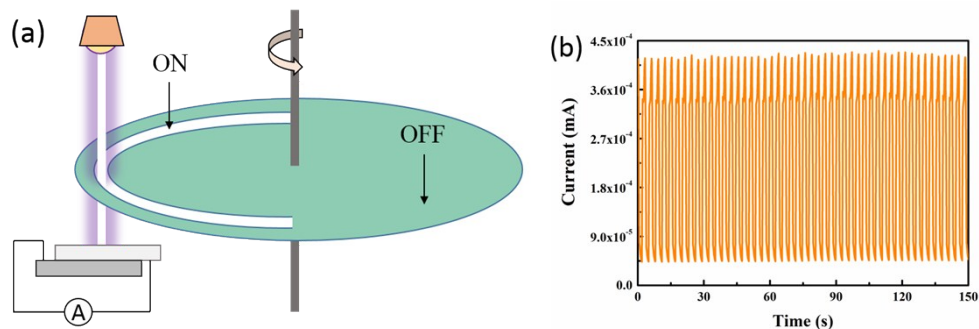

Fig. S2 The schematic illustration of the automatic switching device (a) and the time-current response of the improved device in 50 cycles under on/off UV light of 254 nm, 400  $\mu$ w/cm<sup>2</sup> (b)..

The automatic switching device was set with a rotational speed of 20 rpm, avoiding the error caused by human operation. The PEC UV-PD is really stable under 50 cycles under the time-current response testing.
